# Supplementary material for: Nanoparticle-Based Visual Detection of Amplified DNA for Diagnosis of Hepatitis C Virus
Source: MDPI journal article supplement (doi:10.3390/bios12090744), 2022-09-09
Supplement: s1 [file s1]

# Nanoparticle-Based Visual Detection of Amplified DNA for Diagnosis of Hepatitis C Virus

Soo-Kyung Kim <sup>1</sup>, Yoon-Hee Oh <sup>2</sup>, Dae-Hyun Ko <sup>2</sup>, Heungsup Sung <sup>2</sup>, Heung-Bum Oh <sup>2</sup> and Sang-Hyun Hwang <sup>2,\*</sup>

<sup>1</sup> Department of Laboratory Medicine, Ewha Womans University College of Medicine, Seoul 07985, Korea

<sup>2</sup> Department of Laboratory Medicine, Asan Medical Center, University of Ulsan College of Medicine, Seoul 05505, Korea

\* Correspondence: mindcatch@amc.seoul.kr; Tel.: +82-2-3010-4502

| Streptavidin-coated magnetic particles | Anti-digoxigenin alpha particles<br>(0.5 $\mu$ L, 1.0 $\mu$ L, or 2.0 $\mu$ L were added to each tube, from left to right) |                                                                                     |
|----------------------------------------|----------------------------------------------------------------------------------------------------------------------------|-------------------------------------------------------------------------------------|
|                                        | 1 min after addition                                                                                                       | 2 min after addition                                                                |
| 0.5 $\mu$ L                            |                                           |   |
| 1.0 $\mu$ L                            |                                           |   |
| 2.0 $\mu$ L                            |                                          |  |

**Figure S1.** Streptavidin-coated magnetic particles and anti-digoxigenin antibody-coated alpha particles were added at 0.5, 1.0, and 2.0  $\mu$ L to produce a clear visualization of particle-amplicon aggregations. All experiments were performed in triplicate, at least. Mixing 1  $\mu$ L or 2  $\mu$ L of streptavidin-coated magnetic particles with 1  $\mu$ L of anti-digoxigenin polystyrene particles led to the formation of particles-HCV amplicon complexes within 1 min. Prominent aggregation of particles-amplicon complexes was observed after 2 min when using 2  $\mu$ L of streptavidin-coated particles, regardless the concentration of anti-digoxigenin particles.
